# Supplementary material for: Health Literacy among Pregnant Women in a Lifestyle Intervention Trial
Source: MDPI journal article supplement (doi:10.3390/ijerph19105808), 2022-05-10
Supplement: s1 [file s1]

**Table S1.** Knowledge questionnaire.

| <b>Topic</b>            | <b>Question</b>                                                                                                                    |
|-------------------------|------------------------------------------------------------------------------------------------------------------------------------|
| Gestational weight gain | Is it generally recommended for women of normal weight to gain 20 kilograms during pregnancy?                                      |
| Portion size            | Do pregnant women have to eat larger portions right from the start of their pregnancy to make sure that the baby gets enough food? |
| Alcohol                 | Can even small amounts of alcohol harm the unborn baby at any point during pregnancy?                                              |
| Smoking                 | Does it harm the unborn child if people smoke around the pregnant woman (passive smoking)?                                         |
| Physical activity       | Does it harm the unborn child if women exercise during pregnancy?                                                                  |
| Breast-feeding          | Does breastfeeding work better the earlier a pregnant woman receives information about breastfeeding?                              |
| Water                   | Is tap water just as good for a pregnant woman as bottled mineral water?                                                           |
| Whole grains            | Are wholegrain products usually the better choice if you want to eat pasta, bread or rice while pregnant?                          |
